# Supplementary material
Source: PubMed Central journal article supplement (PMC4648463)
Supplement: supp_mcv053_aob-14899-s01.pdf [file supp_mcv053_aob-14899-s01.pdf]

SUPPLEMENTARY DATA

Figure S1. Image of *C. obovata*, highlighting the proximal and distal regions of rhizophores.

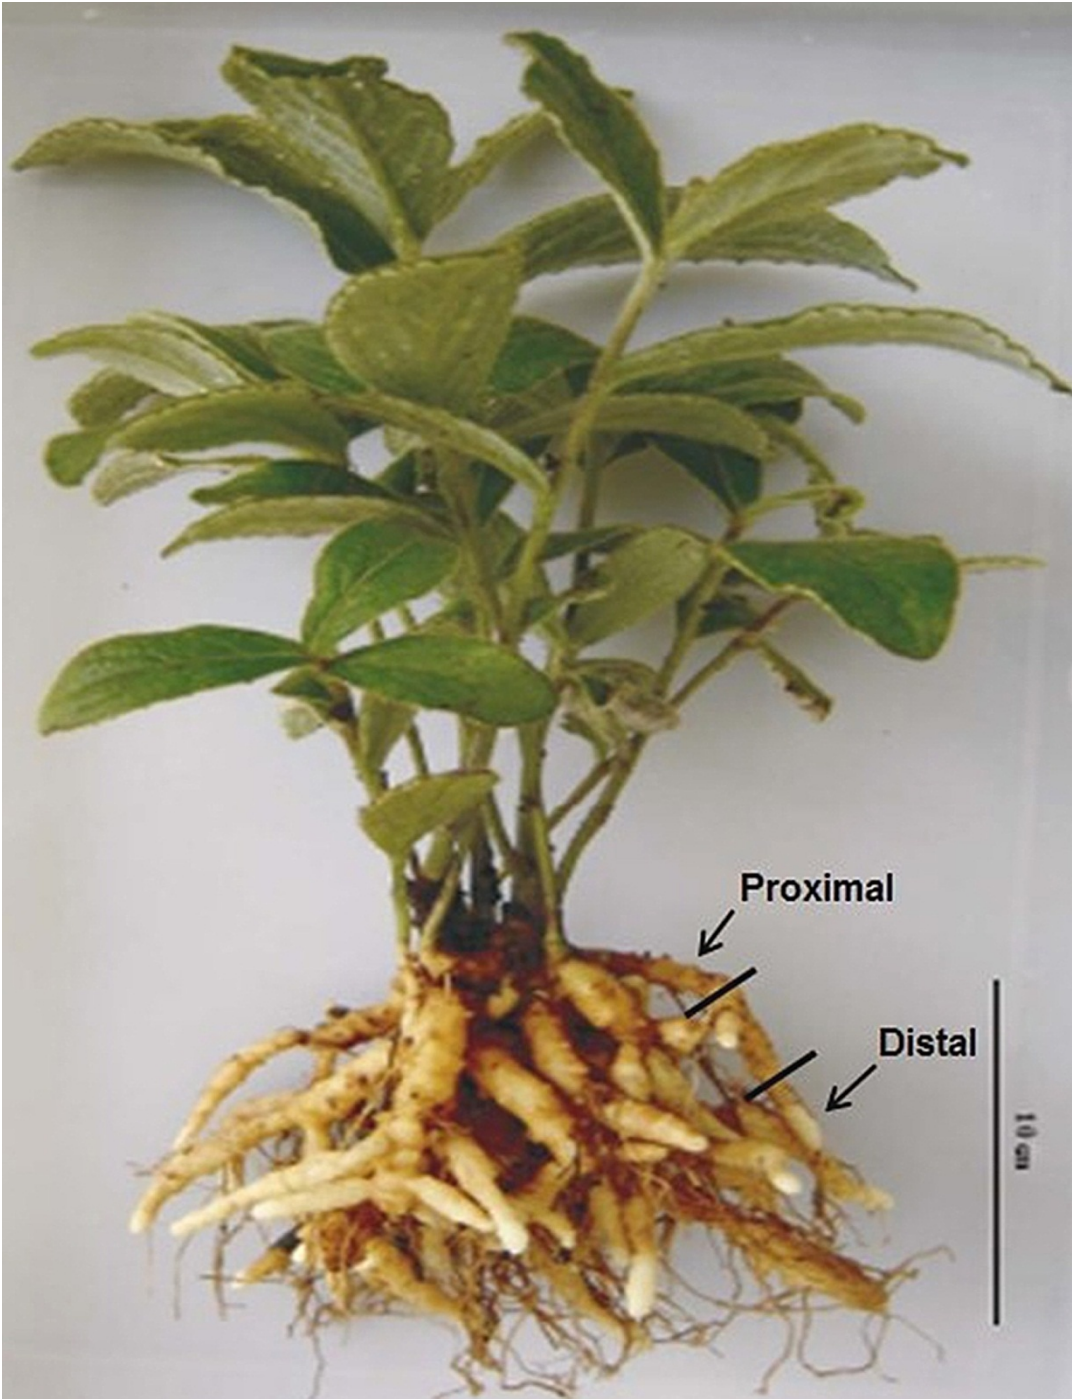

Figure S2. Water retention curves of Cerrado soil samples collected at different depths: 0–10 cm (circles), 20–30 cm (diamonds) and 40–50 cm (triangles).  $n = 3$ . Inset: interval of pressure between 0 and 0.1 MPa.

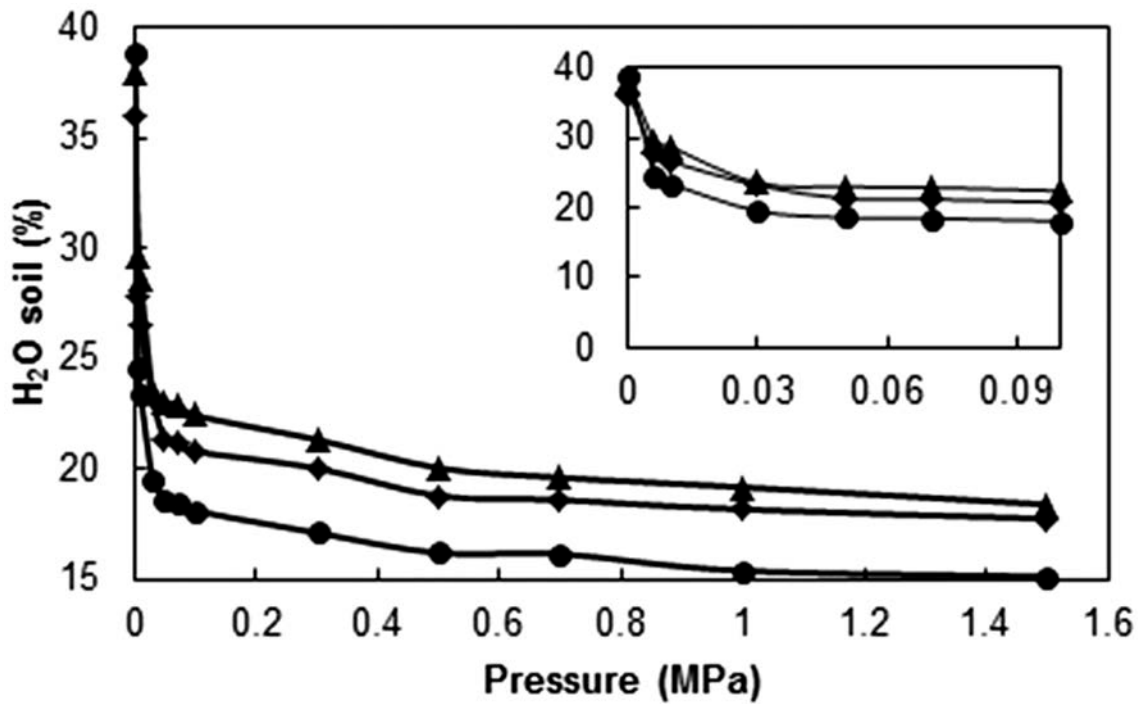

Table S1. List of primers used for qRT-PCR

| Gene            | Primer sequence              | Fragment size (pb) | TM (°C) | Efficiency | $r^2$  | Genbank accession number |
|-----------------|------------------------------|--------------------|---------|------------|--------|--------------------------|
| <i>1-FEH</i>    | F 5'-GGCGGATGTTACAATCTCGT-3' | 199                | 60      | 99.9       | 0.9991 | AM231149                 |
|                 | R 5'-GTTTTGGAACACCCGAAAGA-3' |                    | 60      |            |        |                          |
| <i>1-SST</i>    | F 5'-CATGCTCTACACTGGCAACG-3' | 102                | 62      | 93.4       | 0.9987 | KM597067                 |
|                 | R 5'-TAGATGGGTCCCGAAAATCC-3' |                    | 59      |            |        |                          |
| <i>EF</i>       | F 5'-GCTCCTGGACATCGTGACTT-3' | 163                | 61      | 92.7       | 0.9926 | KM597066                 |
|                 | R 5'-GACCCCAAGAGTGAAAGCAA-3' |                    | 60      |            |        |                          |
| <i>18S rRNA</i> | F 5'-GGCGACGCATCATTCAAAT-3'  | 163                | 60      | 99.4       | 0.9988 | U42501                   |
|                 | R 5'-TCCGGAATCGAACCCCTAAT-3' |                    | 60      |            |        |                          |
